# Supplementary material for: Absent in Melanoma 2 (AIM2) Regulates the Stability of Regulatory T Cells
Source: MDPI journal article supplement (doi:10.3390/ijms23042230), 2022-02-17
Supplement: s1 [file s1]

**Table S1. List of reagents, antibodies and primers****1.1. Reagents.**

| <b>Product Name</b>                                                     | <b>Supplier</b>                          | <b>Catalog no.</b> |
|-------------------------------------------------------------------------|------------------------------------------|--------------------|
| <b>EasySep™ Mouse CD4+ T Cell Isolation Kit</b>                         | STEMCELL Technologies, Vancouver, Canada | 19852              |
| <b>EasySep™ Mouse Naïve CD4+ T Cell Isolation Kit</b>                   | STEMCELL Technologies, Vancouver, Canada | 19765              |
| <b>Intracellular Fixation and Permeabilization Buffer + Brefeldin A</b> | eBioscience, San Diego, CA, USA          | 88-8823-88         |
| <b>H<sub>2</sub>O<sub>2</sub> 30%</b>                                   | Sigma Aldrich, St. Louis, MO, USA        | H-1009             |
| <b>Bovine Serum Albumine (BSA)</b>                                      | Santa Cruz Biotechnologies               | sc-2323            |
| <b>L-Lysine monohydrochloride</b>                                       | Sigma Aldrich, St. Louis, MO, USA        | L5626-500G         |
| <b>Endogenous Avidin + Biotin blocking solution</b>                     | abcam, Cambridge, United Kingdom         | ab64212            |
| <b>Vectastain ABC-HRP kit, Peroxidase (Standard)</b>                    | Vector Laboratories, Burlingame, CA, USA | PK-4000            |
| <b>DAB peroxidase substrate kit</b>                                     | Vector Laboratories, Burlingame, CA, USA | SK-4100            |
| <b>Eukitt® mounting medium</b>                                          | Panreac, Barcelona, Spain                | 253681             |
| <b>Biocoll Separating Solution</b>                                      | Merck, Kenilworth, New Jersey, USA       | L6115              |
| <b>EasySep™ Human CD4+ T cell isolation kit</b>                         | STEMCELL Technologies, Vancouver, USA    | 17952              |
| <b>Advanced RPMI 1640 medium</b>                                        | Life Technologies, Carlsbad, CA, USA     | 12633020           |
| <b>IMDM medium with L-Glutamin (4mM)</b>                                | Life Technologies, Carlsbad, CA, USA     | 21980032           |
| <b>Fetal Bovine Serum, heat inactivated</b>                             | Life Technologies, Carlsbad, CA, USA     | 10082-147          |
| <b>L-Glutamine (200 mM)</b>                                             | Life Technologies, Carlsbad, CA, USA     | 25030-024          |
| <b>Penicillin-Streptomycin (10000 U/mL)</b>                             | Life Technologies, Carlsbad, CA, USA     | 15140-122          |
| <b>IL17A mouse uncoated ELISA Ready-Set-Go kit</b>                      | Life Technologies, Carlsbad, CA, USA     | 88-7371-88         |
| <b>IL10 mouse uncoated ELISA Ready-Set-Go kit</b>                       | Life Technologies, Carlsbad, CA, USA     | 88-7105-77         |
| <b>IL4 mouse uncoated ELISA Ready-Set-Go kit</b>                        | Life Technologies, Carlsbad, CA, USA     | 88-7044-88         |
| <b>IFNγ mouse uncoated ELISA Ready-Set-Go kit</b>                       | Life Technologies, Carlsbad, CA, USA     | 88-7314-88         |
| <b>Recombinant mouse IL-12p70 protein</b>                               | Peprotech, Rocky Hill, NJ, USA           | AF-210-12          |
| <b>Recombinant mouse IL-2 protein</b>                                   | Peprotech, Rocky Hill, NJ, USA           | AF-212-12          |
| <b>Recombinant mouse IL-6 protein</b>                                   | Peprotech, Rocky Hill, NJ, USA           | AF-216-16          |
| <b>Recombinant human TGF-β protein</b>                                  | Peprotech, Rocky Hill, NJ, USA           | AF-100-21          |
| <b>Recombinant mouse IL-4 protein</b>                                   | R&D Systems, Minneapolis, USA            | 404-ML-010         |

|                                                                                  |                                        |               |
|----------------------------------------------------------------------------------|----------------------------------------|---------------|
|                                                                                  |                                        |               |
| <b>RNeasy Mini kit</b>                                                           | Qiagen, Hilden, Germany                | 74106         |
| <b>qScript One-step RT-qPCR kit</b>                                              | QuantaBio, Beverly, USA                | QUNT95086-200 |
| <b>RNAlater</b>                                                                  | Qiagen, Hilden, Germany                | 76106         |
| <b>Protease inhibitor cocktail</b>                                               | Sigma Aldrich, St. Louis, MO, USA      | P8340         |
| <b>LDS sample buffer (4X) NuPAGE</b>                                             | Thermo Fisher Scientific, Waltham, USA | NP0008        |
| <b><math>\beta</math>-2mercaptoethanol</b>                                       | Thermo Fisher Scientific, Waltham, USA | 31350010      |
| <b>NuPAGE 4-12% Bis-Tris, 1.0 mm Mini Protein Gel, 10-wells</b>                  | Thermo Fisher Scientific, Waltham, USA | NW04122BOX    |
| <b>Immunoblot PVDF membranes</b>                                                 | BioRad, Hercules, CA, USA              | 1620177       |
| <b>Tween 20</b>                                                                  | Merck, Kenilworth, New Jersey, USA     | P9416         |
| <b>Supersignal West Femto Chemi</b>                                              | Thermo Fisher Scientific, Waltham, USA | W6421N        |
| <b>Supersignal West Pico Chemi</b>                                               | Thermo Fisher Scientific, Waltham, USA | 34080         |
| <b>CFSE</b>                                                                      | Labclinics, Barcelona, Spain           | 65-0850--84   |
| <b>CellTrace Far Red Cell Proliferation Kit</b>                                  | Thermo Fisher Scientific, Waltham, USA | C34564        |
| <b>Annexin V</b>                                                                 | Labclinics, Barcelona, Spain           | 88-8102-72    |
| <b>7-AAD Viability Staining Solution</b>                                         | Labclinics, Barcelona, Spain           | 00-6993-50    |
| <b>Formalin Solution Neutral Buffered, 10%</b>                                   | Sigma Aldrich, St. Louis, MO, USA      | HT501128      |
| <b>GemCut Paraffin, 56-58°C</b>                                                  | Polysciences, Warrington, PA, USA      | 24361-1       |
| <b>Harris Haematoxylin</b>                                                       | Leica Biosystems, Wetzlar, Germany     | 3801561       |
| <b>Eosin-Phloxin</b>                                                             | DiaPath, Martinengo, Italy             | C0343         |
| <b>Dynabeads™ Mouse T-Activator CD3/CD28 for T-Cell Expansion and Activation</b> | Life Technologies, Carlsbad, CA, USA   | 11456D        |
| <b>Qubit RNA HS Assay Kit</b>                                                    | Thermo Fisher Scientific, Waltham, USA | Q32855        |
| <b>Agilent RNA 6000 Nano Chips</b>                                               | Agilent Technologies                   | 5067-1511     |
| <b>TruSeq Stranded mRNA Library Prep Kit set A</b>                               | Illumina                               | RS-122-2101   |
| <b>TruSeq Stranded mRNA Library Prep Kit set B</b>                               | Illumina                               | RS-122-2102   |
| <b>DNA-free DNA removal kit</b>                                                  | Thermo Fisher Scientific, Waltham, USA | AM1906        |

## 1.2. Antibodies.

| Name                            | Supplier                   | Catalog no. | Clone no. |
|---------------------------------|----------------------------|-------------|-----------|
| <b>Anti mouse CD3 antibody,</b> | eBioscience – ThermoFisher | 16-0031-86  | 17A2      |

|                                                                  |                                                         |             |              |
|------------------------------------------------------------------|---------------------------------------------------------|-------------|--------------|
| <b>functional grade purified</b>                                 | Scientific, Waltham, MA, USA                            |             |              |
| <b>Anti mouse CD28 antibody, functional grade purified</b>       | eBioscience – ThermoFisher Scientific, Waltham, MA, USA | 16-0281-82  | 37.51        |
| <b>IL-12 p35 Rat anti-Mouse</b>                                  | Ivitrogen – ThermoFisher Scientific, Waltham, MA, USA   | 14-7122-285 | C18.2        |
| <b>IL-4 Rat anti-Mouse</b>                                       | Ivitrogen – ThermoFisher Scientific, Waltham, MA, USA   | 16-7041-85  | 11B11        |
| <b>Anti-FOXP3 Monoclonal Antibody</b>                            | eBioscience – ThermoFisher Scientific, Waltham, MA, USA | 14-5773-82  | FJK-16s      |
| <b>Biotinylated goat anti-Rat IgG</b>                            | Vector Laboratories, Burlingame, CA, USA                | BA-9400     | Polyclonal   |
| <b>In Vivo mAb Anti-mouse IL4 antibody</b>                       | BioxCel, Lebanon, NH, USA                               | BE0045      | 11B11        |
| <b>In Vivo mAb Anti-mouse IFNg antibody</b>                      | BioxCel, Lebanon, NH, USA                               | BE0055      | XMG1.2       |
| <b>IL17 antibody, anti-mouse, FITC</b>                           | Milteny Biotec, Bergisch Gladbach, Germany              | 130-102-262 | TC11-18H10   |
| <b>IFNg antibody, anti-mouse, APC</b>                            | Milteny Biotec, Bergisch Gladbach, Germany              | 130-109-723 | REA638       |
| <b>FOXP3 antibody, anti-mouse, PE</b>                            | Milteny Biotec, Bergisch Gladbach, Germany              | 130-111-678 | REA788       |
| <b>AIM2 Polyclonal Antibody</b>                                  | eBioscience – ThermoFisher Scientific, Waltham, MA, USA | 14-6008-93  | n/a          |
| <b>Goat anti-Rabbit IgG, Secondary Antibody, Alexa Fluor 647</b> | Ivitrogen – ThermoFisher Scientific, Waltham, MA, USA   | A21244      | n/a          |
| <b>Rat IgG1 isotype control antibody</b>                         | Milteny Biotec, Bergisch Gladbach, Germany              | 130-102-644 | ES26-14D1.11 |
| <b>REA control antibody, APC</b>                                 | Milteny Biotec, Bergisch Gladbach, Germany              | 130-104-630 | n/a          |
| <b>REA control antibody, PE</b>                                  | Milteny Biotec, Bergisch Gladbach, Germany              | 130-104-628 | n/a          |
| <b>AIM2 (D-14) antibody</b>                                      | Santa Cruz Biotechnologies, Dallas, Texas, USA          | sc-137967   | Polyclonal   |
| <b>Anti-Rabbit IgG HRP secondary antibody</b>                    | Jackson ImmunoResearch, West Grove, PA, USA             | 111-035-003 | Polyclonal   |
| <b>ASC (N-15) antibody</b>                                       | Santa Cruz Biotechnologies, Dallas, Texas, USA          | sc-22514-R  | Polyclonal   |
| <b>CASP-1 14F468 antibody</b>                                    | Santa Cruz Biotechnologies, Dallas, Texas, USA          | sc-56036    | 14F468       |
| <b><math>\beta</math>-actin antibody</b>                         | Merck, Kenilworth, New Jersey, USA                      | A1978       | AC-15        |
| <b>Anti-Mouse IgG HRP secondary antibody</b>                     | Jackson ImmunoResearch, West Grove, PA, USA             | 115-035-003 | Polyclonal   |

1.3. Primers. All primers were purchased from Integrated DNA Technologies (Coralville, IA, USA).

| Name                                 | Sequence                      |
|--------------------------------------|-------------------------------|
| <b>Aim2 forward primer for qPCR</b>  | 5'-TGGCCACGGAGACAGATTTT-3'    |
| <b>Aim2 reverse primer for qPCR</b>  | 5'-GGAAGTGGTGACCTCCATGA-3'    |
| <b>Nlrp3 forward primer for qPCR</b> | 5'-CCGTCTACGTCTTCTTCCTTTC -3' |
| <b>Nlrp3 reverse primer for qPCR</b> | 5'-CGCAGATCACACTCCTCAAATA -3' |
| <b>Casp1 forward primer for qPCR</b> | 5'-TACACGTCTTGCCCTCATTATC-3'  |
| <b>Casp1 reverse primer for qPCR</b> | 5'-CTCCAGCAGCAACTTCATTTC-3'   |
| <b>Gapdh forward primer for qPCR</b> | 5'-CTTTGGCATTGTGGAAGGGC-3'    |
| <b>Gapdh reverse primer for qPCR</b> | 5'-CAGGGATGATGTTCTGGGCA-3'    |
