# Supplementary material for: Absent in Melanoma 2 (AIM2) Regulates the Stability of Regulatory T Cells
Source: MDPI journal article supplement (doi:10.3390/ijms23042230), 2022-02-17
Supplement: s1 [file s1]

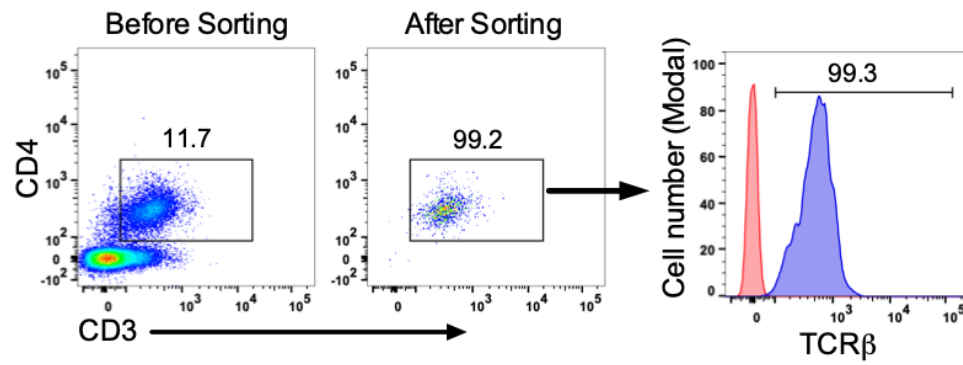

**Figure S1.** Purity of the sorted CD4<sup>+</sup> cells.

Flow cytometry analysis of the expression of CD3<sup>+</sup>CD4<sup>+</sup>TCRβ<sup>+</sup> cells after sorting in a FACSAria III flow cytometer using FACSDiva software. Purity of the sorted populations was higher than 98.5% in all experiments.

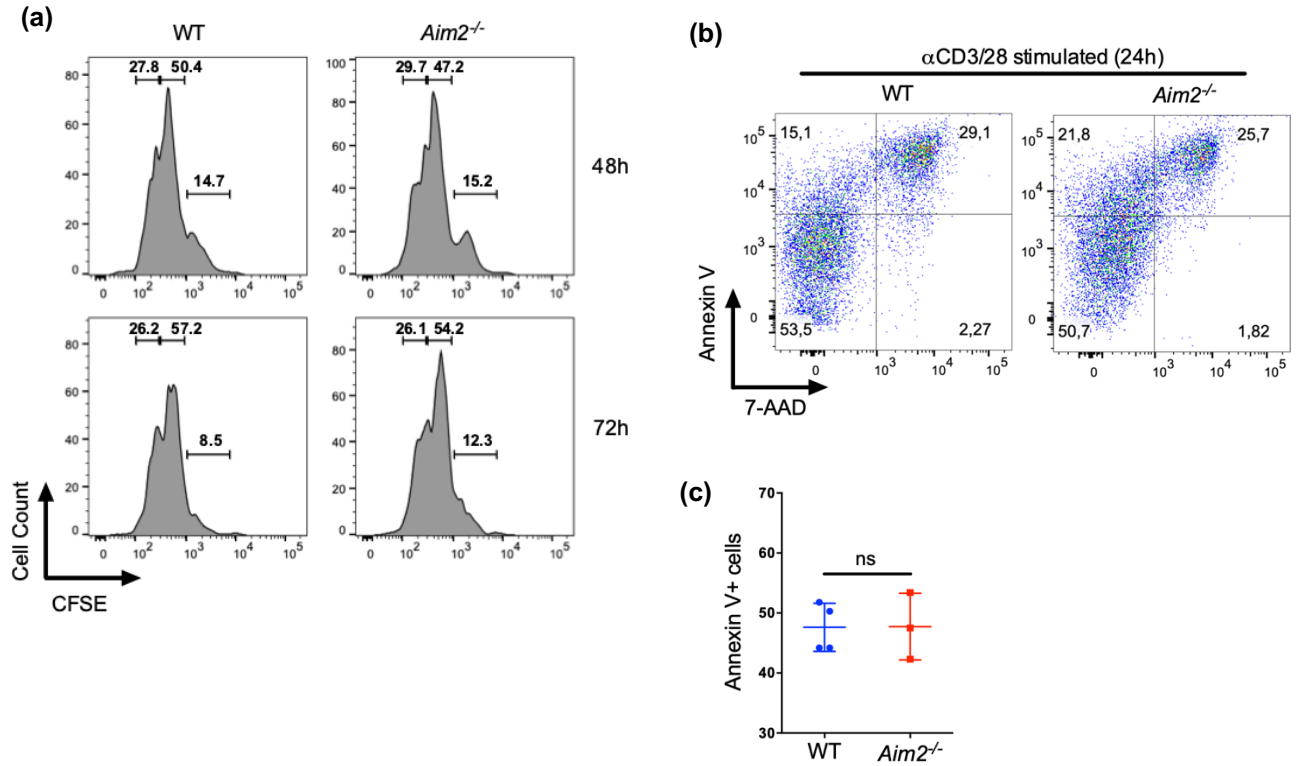

**Figure S2.** Activation-induced cell death and proliferation in WT and *Aim2*<sup>-/-</sup> CD4<sup>+</sup> T cells.

**A)** Evaluation of proliferative cells by flow cytometry analysis of CFSE-labeled CD4<sup>+</sup> T cells from WT or *Aim2*<sup>-/-</sup> mice after 48 and 72 hours of anti-CD3/CD28 stimulation. Data are from one mouse, representative of 4 mice per group. **B)** Flow cytometry analysis of early apoptotic (Annexin V<sup>+</sup>, 7-AAD<sup>-</sup>), late-stage apoptotic (Annexin V<sup>+</sup>, 7-AAD<sup>+</sup>), and necrotic (Annexin V<sup>-</sup>, 7-AAD<sup>+</sup>) cells from WT (n=4) or *Aim2*<sup>-/-</sup> (n=3) mice after 24 hours of stimulation with anti-CD3/CD28 antibodies. **C)** Scatter plot graph of the percentage of total Annexin V positive cells. Data were analyzed using t test with Welch's correction, ns = not significant.

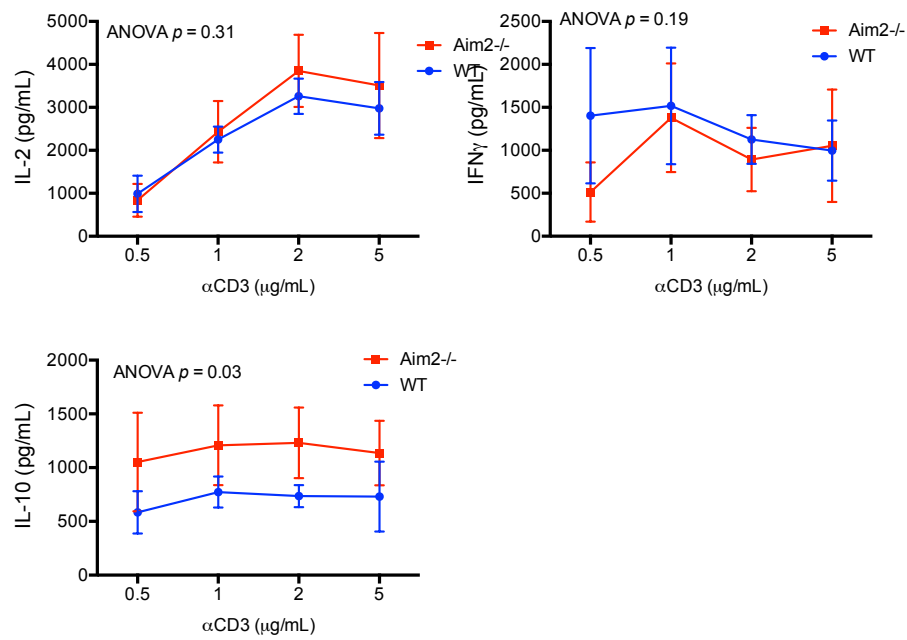

**Figure S3.** Stimulation threshold in WT and *Aim2*<sup>-/-</sup> CD4<sup>+</sup> T cells

Splenic CD4<sup>+</sup> T cells from WT or *Aim2*<sup>-/-</sup> mice (n=3 per group) were stimulated with increasing concentrations of plate-bound anti-CD3 antibody (αCD3) and a fixed concentration of anti-CD28 antibody (2 μg/mL). Culture supernatants were collected at 24 hours and analyzed for IL-2, IFN $\gamma$ , and IL-10 production by ELISA. Results were analyzed by two-way ANOVA.

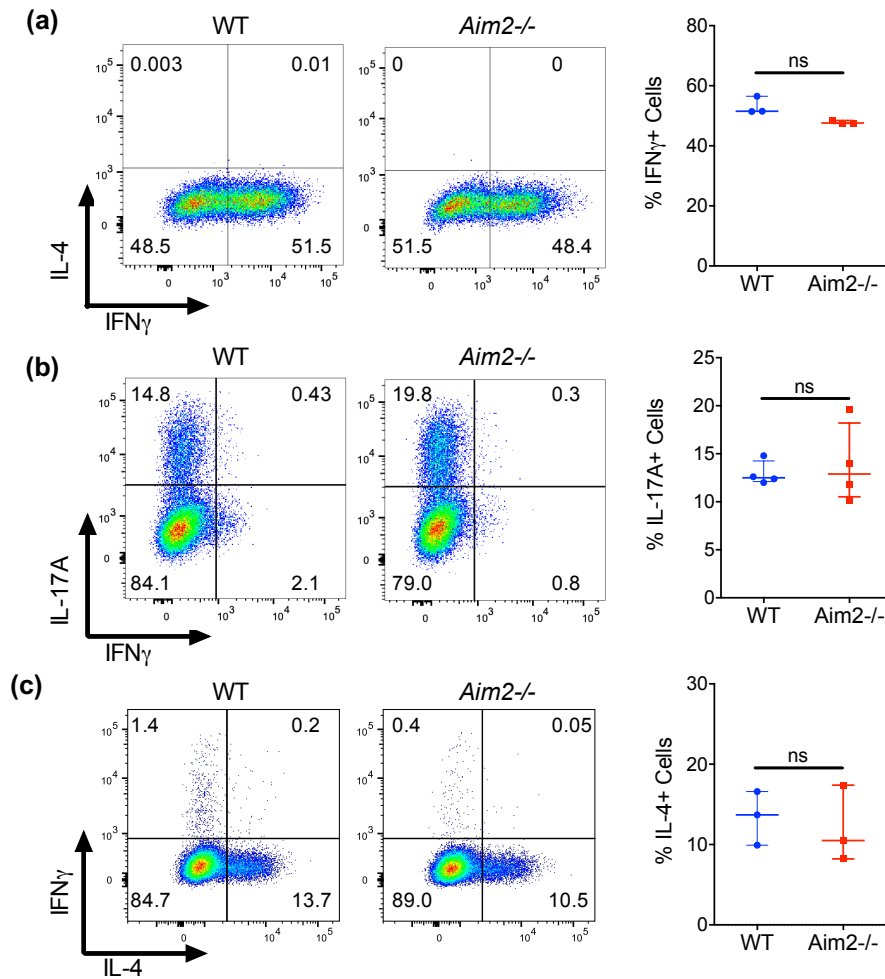

**Figure S4.** AIM2 deficiency does not affect Th1, Th2 or Th17 differentiation

**(a-c)** Flow cytometry analysis of intracellular cytokines in naïve CD4<sup>+</sup> T cells from WT or *Aim2*<sup>-/-</sup> mice cultured in Th1 (a), Th2 (b) or Th17 (c) polarizing conditions for 5 days and re-stimulated with anti-CD3/CD28 antibodies for 5 hours. Data were analyzed using t test with Welch's correction, and are displayed as scatter plot with median ± interquartile range, ns = not significant.

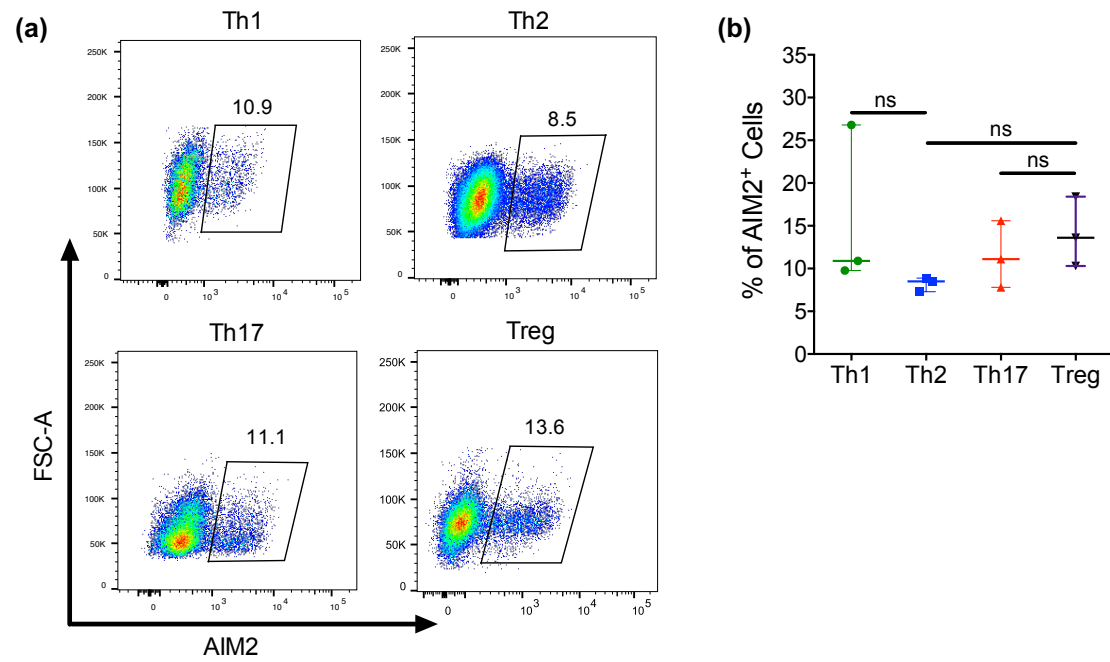

**Figure S5.** AIM2 expression in different CD4<sup>+</sup> T cell subsets generated in vitro

**(a)** Flow cytometry analysis of AIM2 expression in WT naïve CD4<sup>+</sup> T cells 5 days after culture in Th1, Th2, Th17 or Treg (iTreg) conditions. **(b)** Data from three mice in each condition were analyzed using a Holm-Sidak's multiple comparisons test and displayed as scatter plot with median ± interquartile range, ns = not significant.

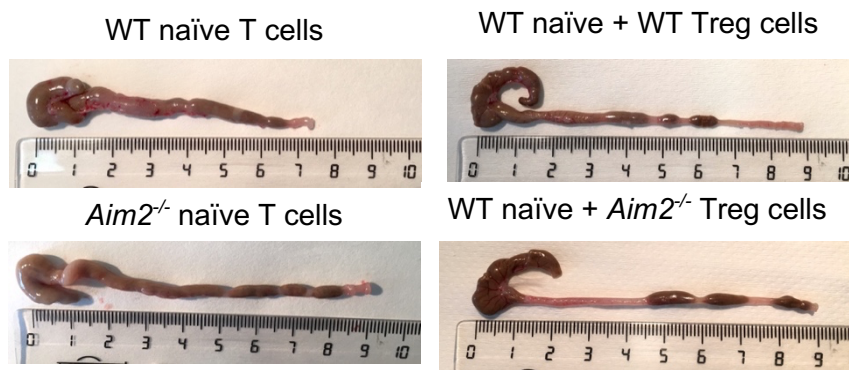

**Figure S6.** Macroscopic analysis of colons from *Rag1*<sup>-/-</sup> mice after adoptive transfer  
Representative pictures of colons from *Rag1*<sup>-/-</sup> mice reconstituted with naïve T cells (CD4<sup>+</sup>CD45RB<sup>high</sup>CD25<sup>-</sup>) from WT or *Aim2*<sup>-/-</sup> mice, or cotransferred with WT naïve T cells plus regulatory T cells (CD4<sup>+</sup>CD45RB<sup>low</sup>CD25<sup>+</sup>) from either WT or *Aim2*<sup>-/-</sup> mice.

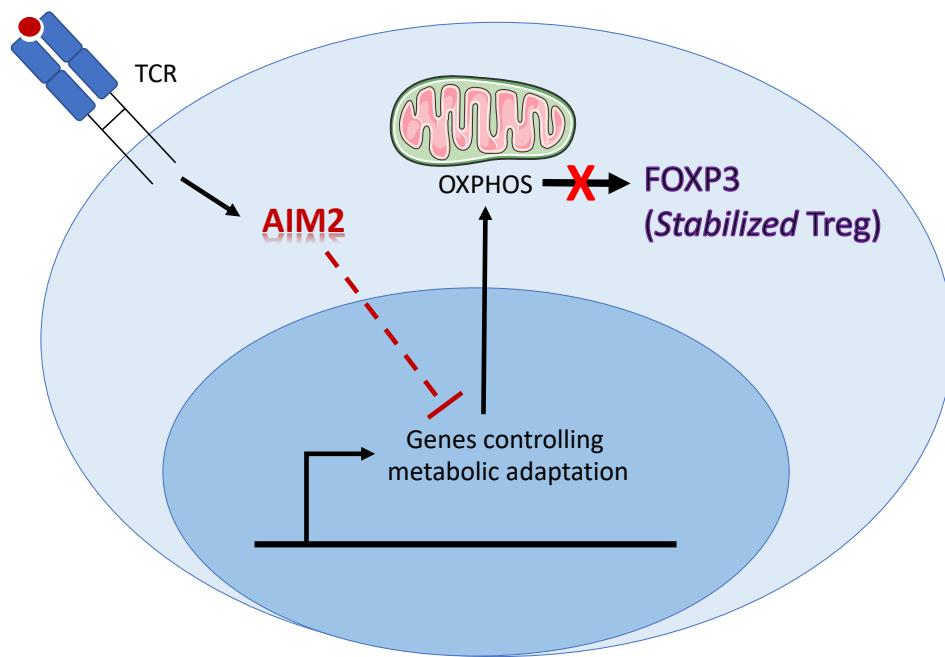

**Figure S7.** Graphical abstract.

Upon T cell receptor (TCR) activation of CD4<sup>+</sup> T cells, AIM2 expression is transiently increased and suppresses the expression of genes associated with oxidative phosphorylation (OXPHOS) and mitochondrial respiration, thereby reducing FOXP3 expression and Treg stability.
